# Supplementary material
Source: publisher site journal article supplement (https://www.dovepress.com/get_supplementary_file.php?f=286488.docx)
Supplement: Supplementary file 1 [file get_supplementary_file.php]

**Supplementary Table S1** Variables definitions

| Variable | Definition |
| --- | --- |
| *Independent* | |
| Sex | Gender of the respondent: ‘Male’ vs ‘Female’ |
| Age | Age of each respondent (years): ‘Younger’ vs ‘Older’. The category “younger” refers to those respondents with less than the mean years of age, while the rest considered “older” |
| Marital status | Marital status of the respondent: ‘Never married’ vs ‘Ever married’ |
| Number of persons in household | Number of family members reported in the household of the respondent (number): ‘Low’ [ie, <mean] vs ‘High’ [ie, ≥mean] |
| Income of the respondent | Annual net monthly income of the respondent alone (birr): ‘Lower’ [ie, <mean] vs ‘Higher’ [ie, ≥mean] |
| Income of the household | Annual net monthly income of the household of each respondent (birr): ‘Lower’ [ie, <mean] vs ‘Higher’ [ie, ≥mean] |
| Professional qualification | Professional qualification level of the respondent in health care: ‘Less than first degree (<BS)’ vs ‘First degree and above (≥BS)’ |
| Professional role type | Professional role type of the respondent in health care: ‘Nurse’ vs ‘Other’. The category “other” denoted for all the other baseline categories of the healthcare professional role [physician, dentist, midwife, lab technologist/technician, physiotherapist, anesthetist, pharmacist/pharmacy technician, and health officer clinician] from the questioner |
| Professional experience | Professional experience level of the respondent in health care (years): ‘Junior’ vs ‘Senior’. The category “junior” refers to participants who had <4 years of professional experience, whereas “senior” refers to those who had ≥4 years of professional experience |
| Sector of workplace | Sector of the healthcare facility as the respondent’s current workplace: ‘Public’ vs ‘Private’ |
| Department of workplace | The participant’s current department or unit of work: ‘Emergency’ vs ‘Other’ |
| Workload status | Self-estimated average daily amount of work throughout employment history as a healthcare staff in the current workplace (hours); then based on the actual response of the participants, the variable workload was transformed into dummy: ‘High’ [≥12] vs ‘Low' [<12] |
| RIIP presence in workplace | Is there any available RIIP in your workplace (at the facility level): ‘Yes’ vs ‘No’ |
| Perceived susceptibility to infection | The participant’s perceived level of susceptibility to occupational blood-borne infection (ranging from 0=very low to 10=very high). Then considering the mean response value among all participants, the variable perceived susceptibility was transformed into dummy for analysis purpose: ‘High’ [ie, ≥mean] vs ‘Low’ [ie, <mean] |
| Perceived severity of infection | The participant's perceived severity of HB infection (from 0=very lenient to 10=very harsh). Then considering the mean response value, the variable perceived severity was transformed into dummy: ‘Harsh’ vs ‘Lenient’ |
| Perceived efficacy of vaccine | The participant's perceived effectiveness of HB vaccine against HB virus infection (ranging from 0=very ineffective to 10=very effective). Then considering the mean response value, the variable was transformed into dummy: ‘Effective’ vs ‘Ineffective’ |
| Perceived safety of vaccine | The participant's perceived safety of HB vaccine concerning its side effects (ranging from 0=extremely unsafe to 10=extremely safe). Then considering the mean response value, the variable was transformed into dummy: ‘Safe’ vs ‘Unsafe’ |
| Perceived affordability of vaccine | The participant's perceived cost affordability of the HB vaccine (ranging from 0=very expensive to 10=very cheap). Then considering the mean response value, the variable was transformed into dummy: ‘Expensive’ vs ‘Cheap’ |
| Perceived accessibility of vaccine | The participant's perceived accessibility of HB vaccine in the nearby health facility (ranging from 0=very difficult to 10=very easy). Then considering the mean response value, the variable was transformed into dummy: ‘Easy’ vs ‘Difficult’ |
| Perceived efficacy of PPE | The participant’s perceived efficacy of PPE (eg, glove, mask, face shield) against occupational or nosocomial HB virus infection (ranging from 0=very ineffective to 10=very effective). Then considering the mean response value, the variable was transformed into dummy: ‘Effective’ vs ‘Ineffective’ |
| Perceived efficacy of PEP | The participant's perceived efficacy of PEP against HB infection–after someone exposed to the infected blood (ranging from 0=very ineffective to 10=very effective). Then considering the mean response value, the variable was transformed into dummy: ‘Effective’ vs ‘Ineffective’ |
| Ever tested for HIV | Did you ever tested for HIV: ‘Yes’ vs ‘No’ |
| Tobacco use | History of active tobacco smoking: ‘Ever’ vs ‘Never’ |
| Alcohol use | History of alcohol drinking: ‘Ever’ vs ‘Never’ |
| Prior OE to blood | History of potentially hazardous OEs with the patients’ blood: ‘Yes’ vs ‘No’. According to our survey questioner used, the variable’s category “yes” refers to participants those who ever had a history of one or more of the following percutaneous or permucosal modes of accidental exposures on the job. |
| - Contaminated needle prick (stick) injury |
| - Contaminated scalpel cut (sharp) injury |
| - Direct splash of blood or other bodily fluids into the eyes and/or mouth |
| - Direct splash of blood or other bodily fluids into impaired (wounded) skin |
| - Direct splash of blood or other bodily fluids into intact (unwounded) skin |
| Adherence in practicing UP | The participant's self-rated adherence in practicing UP on the job (from 0=very poor to 10=very good). Then considering the mean response value among all participants, the variable self-rated adherence in UP was transformed into dummy: ‘Good’ vs ‘Poor’ |
| History of jaundice | Personal history of yellow eyes: ‘Yes’ vs ‘No’ |
| Taken training on UP | Taken routine on-job training on UP: ‘Ever’ vs ‘Never’ |
| Know HB infected persons | Knowing persons diagnosed with HB virus infection: ‘Yes’ vs ‘No’. The variable’s category “yes” refers to participants who responded as yes to one or more of the following items. |
| - Family history of HB |
| - Acquaintance history of HB |
| - Ever seen any person/patient with HB |
| Ever gets colleagues’ suggestion | Does one or more of your collogues suggesting you to receive the HB vaccination: ‘Yes’ vs ‘No’ |
| *Dependent* | |
| HB vaccination uptake | The dependent variable of this study was HB vaccination uptake. Primary data were elicited on whether the respondent had ever vaccinated and the number of doses received. For analysis purpose, the HB vaccination uptake was also reclassified into binary outcome: ‘Complete’ vs ‘Noncomplete’. The category “complete” was defined as the proportion of participants who had received ≥3 doses of HB vaccination, and the rest considered “noncomplete”. This was noted for each participant and was analyzed with regard to the independent variables mentioned above. |

HB, hepatitis B; HIV, human immunodeficiency virus; OE, occupational exposure; PEP, post exposure prophylaxis; PPE, personal protective equipment; RIIP, routine infant immunization program; UP, universal precautions.
